# Supplementary material for: When is it Okay? The Role of State and Trait Disgust in Attitudes Towards Abortion Patients Under Different Circumstances
Source: Research Square preprint supplement (doi:10.21203/rs.3.rs-6637729/v1), 2025-10-10
Supplement: Supplementary file 1 [file 4c51432c95e329fcba5569d5.docx]

**Supplemental Materials**

**State Disgust Validity Check Study 2**

We assessed the ability of the disgust primes to induce state disgust using a manipulation check. An independent sample t-test revealed a significant effect of disgust primes on self-reported disgust, *t*(248) = -28.91, *p* < .001, with significantly higher reported disgust in the high disgust prime (*M* = 6.17, *SD* = 1.40) compared to the low disgust prime (*M* = 1.64, *SD* = 1.00). State sexual disgust had a small but significant correlation with trait sexual disgust (*r* = .13, *p* = .05).

**Trait Disgust Analyses** (Study 2)

**Abortion Scenario Judgments** 
***Sexual Trait Disgust***

Moderated multiple regressions examined the effects of trait sexual disgust, abortion context and their interaction on judgments of warmth, sympathy, moral character and attributions for the target abortion patient. Abortion context was categorical with three levels (medical, socio-economic, and family planning) and dummy coded with the medical condition as the reference group.

**Warmth**. The first step with the covariates was significant, *F*(3, 244) = 41.97, *p* <.001, *R*2 = .34. Only political orientation, β = -.51, *p* < .001, *sr*2 = .14, was a significant covariate in this step. The second step was significant, Δ*F*(3, 241) = 17.46, *p* < .001, *R*2 = .46. Judgements of warmth were significantly higher in the medical emergency condition compared to the socio-economic, β = -.25, *p* < .001, *sr*2 = .05, and the family planning condition, β = -.39, *p* < .001, *sr*2 = .11. Trait sexual disgust was not significant. The final step was not significant, indicating no interaction. 
 **Sympathy.** The first step with the covariates was significant, *F*(3, 244) = 30.29, *p* <.001, 
*R*2 = .27 with only political orientation as a significant predictor, β = -.51, *p* < .001, *sr*2 = .14. The second step was significant, Δ*F*(3, 241) = 16.12, *p* < .001, *R*2 = .393. The socio-economic, β = -.29, *p* < .001, *sr*2 = .06, and the family planning condition, β = -.389, *p* < .001, *sr*2 = .11, elicited significantly less sympathy for the target compared to the medical condition. Trait sexual disgust was not significant. The final step was not significant. 
 **Moral character.** The first step with the covariates was significant, *F*(3, 244) = 46.64, *p* 
< .001, *R*2 = .35. Only political orientation was significant, β = -.50, p < .001, *sr*2 = .13. The second step was significant, Δ*F*(3, 241) = 13.89, p < .001, *R*2 = .45. The socio-economic, β = -.27, *p* < .001, *sr*2 = .05, and the family planning condition, β = -.34, *p* < .001, *sr*2 = .08, elicited significantly lower judgements of the target’s moral character compared to the medical 
condition. Trait sexual disgust was not significant. The final step was not significant. 
 **Attributions.** The first step with the covariates was significant, *F*(3, 244) = 9.15, *p* < 
.001, *R*2 = .10. Only political orientation was significant, β = .23, p = .005, *sr*2 = .03. The second step was significant, Δ*F*(3, 241) = 20.84, *p* < .001, *R*2 = .29. The socio-economic, β = .33, *p* < .001, *sr*2 = .08, and the family planning condition, β =.48, p < .001, *sr*2 = .17, elicited significantly higher dispositional attributions relative to the medical condition. Trait sexual disgust was not significant. The final step was not significant.

**Exploratory Mediational Analyses (Study 2)**

For the vignette-specific variables, moderated mediation models were additionally conducted to assess whether the mediational models were moderated by abortion context. PROCESS macro was employed using bootstrapping to assess the significance of the indirect effects at differing levels of the moderator (Hayes, 2018; Model 7). Bootstrapping with 10,000 resamples was employed to calculate the confidence intervals for the indirect effect. This model tests the moderating effect on the predictor to the mediator path (path A). An index of moderated mediation was used to determine the significance of the moderated mediation, with significant effects supported by the absence of zero within the confidence intervals.

***Moderated Mediations***

The model specified sexual disgust sensitivity (X) as the independent variable, abortion context as the moderator (W) and political orientation (M) as the mediator. The moderator had three levels (medical emergency, socio-economic, family planning) and was dummy coded.

**Warmth Towards Patient**

The direct effect of sexual disgust sensitivity, after controlling for political orientation, was insignificant (*b* = -0.11, *SE* = 0.08, *t*(243)= -1.45, *p* = 0.15), indicating that sexual disgust was not related to rating of warmth towards an abortion patient over and above political orientation. Political orientation as a mediator was significantly related to warmth (*b* = -.56, *SE* = .06, *t*(243) = -9.34,  *p* < .001).

The overall moderated mediation model was supported at W1 (index = -0.20, 95% CI = [-0.37, -0.03]), but not at W2 (index = -0.10, 95% CI = [-0.27, 0.06]), indicating that the mediation effect was influenced by the levels of the moderator (abortion context). The interaction between sexual disgust sensitivity and abortion context on political orientation was marginally significant for W1*X (*b* = .36, *SE* = .19, *t*(244) = 1.92, *p* = .06, [-.01, .72]), but not significant at W2*X (*b* = .19, *SE* = .17, *t*(244) = 1.12, *p* = .27, [-.14, .52]). The conditional indirect effects reflect the differing strengths of the indirect effects based on levels of the moderator. A larger indirect effect was found for abortion contexts in the case of socio-economic (*b* = -.40, 95% CI = [-.56, -.25]) or family planning (*b* = -.31, 95% CI = [-.45, -.18]) contexts than for abortion in the case of medical emergency (*b* = -.20, 95% CI = [-.34, -.08]). These results indicates that abortion context significantly moderates the indirect effect of sexual disgust sensitivity on warmth towards an abortion patient through political orientation. The indirect effect was stronger for socio-economic and family planning abortion contexts than for medical emergencies.

*Figure S6.* Moderated mediation model depicting the indirect effect of sexual disgust sensitivity on warmth towards an abortion patient via political orientation, moderated by abortion context using PROCESS Model 7 (Hayes, 2018). The indirect effect was larger for socio-economic and family planning contexts than for the medical emergency context, indicating that abortion context moderated the mediation pathway. The regression coefficient between sexual disgust and warmth, controlling for political orientation, is in parentheses.

**p* < .05

**Sympathy for Patient**

Results for sympathy align with that of the warmth dependent variable. The direct effect of sexual disgust sensitivity on sympathy, after controlling for political orientation, was insignificant (*b* = -0.14, *SE* = 0.08, *t*(242)= -1.76, *p* = 0.08), indicating that sexual disgust was not related to levels of sympathy for a target abortion patient over and above political orientation. Political orientation as a mediator was significantly related to sympathy (*b* = -.51, *SE* = .06, *t*(242) = -7.90,  *p* < .001).

The overall moderated mediation model was supported at W1 (index = -0.18, 95% CI = [-0.35, -0.02]), but not at W2 (index = -0.10, 95% CI = [-0.26, 0.06]), showing that the mediation effect was influenced by the levels of the moderator (abortion context). The interaction between sexual disgust sensitivity and abortion context on political orientation was marginally significant for W1*X (*b* = .35, *SE* = .19, *t*(242) = 1.90, *p* = .06, [-.01, .72]), but not significant at W2*X (*b* = .19, *SE* = .17, *t*(244) = 1.11, *p* = .27, [-.14, .52]). A larger indirect effect was found for abortion contexts in the case of socio-economic (*b* = -.37, 95% CI = [-.52, -.22]) or family planning (*b* = -.28, 95% CI = [-.43, -.16]) contexts than for abortion in the case of medical emergency (*b* = -.19, 95% CI = [-.33, -.07]). These results indicates that abortion context significantly moderates the indirect effect of sexual disgust sensitivity on sympathy for the abortion patient through political orientation, with a stronger indirect effect of sexual disgust sensitivity for socio-economic and family planning abortion contexts than for medical emergencies.

*Figure S7.* Moderated mediation model depicting the indirect effect of sexual disgust sensitivity on sympathy towards an abortion patient via political orientation, moderated by abortion context. The indirect effect was larger for socio-economic and family planning contexts than for the medical emergency context, indicating that abortion context moderated the mediation pathway. The regression coefficient between sexual disgust and sympathy, controlling for political orientation, is in parentheses.

**p* < .05

**Moral Character Ratings**

Moral character ratings showed a similar pattern of results. The direct effect of sexual disgust sensitivity on sympathy, after controlling for political orientation, was insignificant (*b* = -0.14, *SE* = 0.08, *t*(243)= -1.82, *p* = 0.07), indicating that sexual disgust was not significantly related to moral character ratings of a target abortion patient above and beyond that of political orientation. Political orientation as a mediator was significantly related to moral character ratings (*b* = -.57, *SE* = .06, *t*(243) = -9.36,  *p* < .001).

The overall moderated mediation model was supported at W1 (index = -0.21, 95% CI = [-0.39, -0.02]), but not at W2 (index = -0.11, 95% CI = [-0.29, 0.07]), signifying that the mediation effect was influenced by the levels of abortion context. The interaction between sexual disgust sensitivity and abortion context on political orientation was marginally significant for W1*X (*b* = .36, *SE* = .19, *t*(243) = 1.92, *p* = .06, [-.01, .72]), but not significant at W2*X (*b* = .19, *SE* = .17, *t*(243) = 1.12, *p* = .27, [-.14, .52]). A larger indirect effect was found for abortion contexts in the case of socio-economic (*b* = -.41, 95% CI = [-.58, -.26]) or family planning (*b* = -.32, 95% CI = [-.46, -.19]) contexts than for abortion in the case of medical emergency (*b* = -.21, 95% CI = [-.36, -.08]). These results indicate that abortion context significantly moderates the indirect effect of sexual disgust sensitivity on moral character ratings of the abortion patient through political orientation, with a stronger effect for socio-economic and family planning abortion contexts than for medical emergencies.

*Figure S8.* Moderated mediation model depicting the indirect effect of sexual disgust sensitivity on moral character ratings towards an abortion patient via political orientation, moderated by abortion context. The indirect effect was larger for socio-economic and family planning contexts than for the medical emergency context, indicating that abortion context moderated the mediation pathway. The regression coefficient between sexual disgust and moral character ratings, controlling for political orientation, is in parentheses.

**p* < .05

**Dispositional Attributions**

As with the previous dependent variables, the direct effect of sexual disgust sensitivity on dispositional attributions, after controlling for political orientation, was insignificant (*b* = 0.87, *SE* = 1.62, *t*(243)= .54, *p* = 0.59), showing that sexual disgust was not significantly related to dispositional blame of a target abortion patient after controlling for political orientation. Political orientation as a mediator was significantly related to dispositional attributions (*b* = 5.48, *SE* = 1.29, *t*(243) = 4.24,  *p* < .001).

The overall moderated mediation model was supported at W1 (index = 1.95, 95% CI = [.25, 3.91]), but not at W2 (index = 1.02, 95% CI = [-0.67, 2.79]), indicating that the mediation effect was influenced by the levels of abortion context. The interaction between sexual disgust sensitivity and abortion context on political orientation was marginally significant for W1*X (*b* = .36, *SE* = .19, *t*(243) = 1.92, *p* = .06, [-.01, .72]), but not significant at W2*X (*b* = .19, *SE* = .17, *t*(243) = 1.12, *p* = .27, [-.14, .52]). A larger indirect effect was found for abortion contexts in the case of socio-economic (*b* = 3.94, 95% CI = [1.88, 6.22]) or family planning (*b* = 3.01, 95% CI = [1.43, 4.92]) contexts than for abortion in the case of medical emergency (*b* = 1.98, 95% CI = [.60, 3.91]). These results indicates that abortion context significantly moderates the indirect effect of sexual disgust sensitivity on dispositional attributions of the abortion patient through political orientation, with a stronger effect for socio-economic and family planning abortion contexts than for medical emergencies.

*Figure S9.* Moderated mediation model depicting the indirect effect of sexual disgust sensitivity on attributions of blame towards an abortion patient via political orientation, moderated by abortion context. The indirect effect was larger for socio-economic and family planning contexts than for the medical emergency context, indicating that abortion context moderated the mediation pathway. The regression coefficient between sexual disgust and dispositional attributions, controlling for political orientation, is in parentheses.

**p* < .05

Hayes, A. F. (2018). *An Introduction to Mediation, Moderation, and Conditional Process*

*Analysis: A Regression-Based Approach* (2nd ed.). Guilford Press.
